# Supplementary material
Source: PubMed Central journal article supplement (PMC2932781)
Supplement: NIHMS226747-supplement-1_si_001.pdf [file NIHMS226747-supplement-1_si_001.pdf]

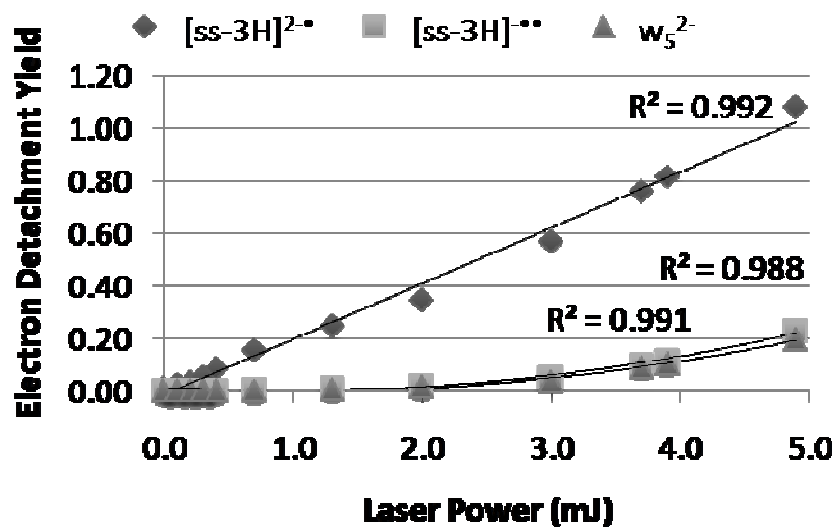

Supplemental Figure 1. Relative peak area abundance versus the laser pulse energy (mJ/pulse) for UVPD of  $[ss6-3H]^{3-}$ . The singly charge reduced product is denoted by the diamond symbol, the doubly charge reduced product is denoted by the square symbol, and the w5 product is denoted by the triangle symbol. The singly charge reduced product follows a linear trend with  $R^2 = 0.992$  as a function of pulse energy, whereas the doubly charge reduced and w5 product ion follow a quadratic trend with  $R^2 = 0.991$  and  $R^2 = 0.988$ .

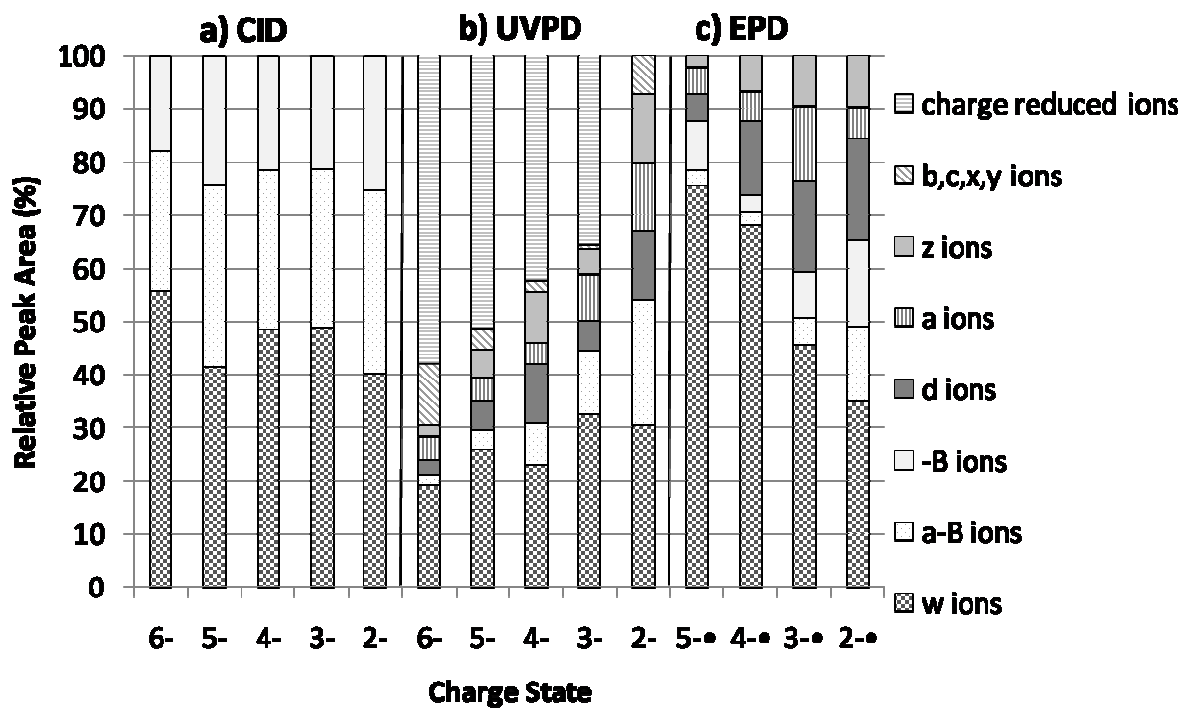

Supplementary Figure 2. Relative distributions of all ion types upon CID, UVPD, and EPD of several charge states for ss12.
